# Supplementary material for: COVID-19 and the Brain: The Neuropathological Italian Experience on 33 Adult Autopsies
Source: MDPI journal article supplement (doi:10.3390/biom12050629), 2022-04-25
Supplement: s1 [file s1]

Table S3: summary of histological findings.

|                                                                    |                | SARS<br>CoV-2<br>RNA<br>SNC                 | Brain features                                                          |                                                                                          |                     |                               |                        | Leptomeningeal features                         |                            |                         |
|--------------------------------------------------------------------|----------------|---------------------------------------------|-------------------------------------------------------------------------|------------------------------------------------------------------------------------------|---------------------|-------------------------------|------------------------|-------------------------------------------------|----------------------------|-------------------------|
|                                                                    |                |                                             | <i>Global hypoxic-ischemic<br/>injury and microglial<br/>activation</i> | <i>Small vessels ectasia,<br/>variable perivascular<br/>edema,<br/>microhaemorrhages</i> | <i>Microthrombi</i> | <i>Recent microinfarcts</i>   | <i>Ancient infarct</i> | <i>Chronic<br/>lymphocitic<br/>inflammation</i> | <i>Blood extravasation</i> | <i>Purulent exudate</i> |
| <b>First<br/>pandemic<br/>wave<br/><br/>(02/2020-<br/>04/2020)</b> | <i>Case 1</i>  | X olfactory<br>tract, medulla<br>oblongata) | X                                                                       | X                                                                                        | X                   | Cortical                      | Frontal lobe           |                                                 |                            |                         |
|                                                                    | <i>Case 2</i>  |                                             | X                                                                       | X                                                                                        | X                   | Cortical                      | Parietal lobe          |                                                 |                            |                         |
|                                                                    | <i>Case 3</i>  |                                             | X                                                                       | X                                                                                        | X                   | Cortical and basal<br>ganglia | Frontal lobe           |                                                 |                            |                         |
|                                                                    | <i>Case 4</i>  |                                             | X                                                                       | X                                                                                        | X                   | Cortical                      |                        | X                                               |                            |                         |
|                                                                    | <i>Case 5</i>  |                                             | X                                                                       | X                                                                                        | X                   | Basal ganglia, brain<br>stem  |                        |                                                 |                            |                         |
|                                                                    | <i>Case 6</i>  |                                             | X                                                                       | X                                                                                        | X                   | Cortical                      |                        |                                                 |                            |                         |
|                                                                    | <i>Case 7</i>  |                                             | X                                                                       | X                                                                                        | X                   | Cortical                      |                        |                                                 |                            |                         |
|                                                                    | <i>Case 8</i>  |                                             | X                                                                       | X                                                                                        | X                   | Cortical, brain stem          |                        |                                                 |                            | X                       |
|                                                                    | <i>Case 9</i>  |                                             | X                                                                       | X                                                                                        | X                   |                               |                        |                                                 | X                          | X                       |
|                                                                    | <i>Case 10</i> |                                             | X                                                                       | X                                                                                        | X                   | Para-hippocampus              |                        |                                                 |                            |                         |
|                                                                    | <i>Case 11</i> |                                             | X                                                                       | X                                                                                        | X                   |                               |                        |                                                 |                            | X                       |
| <b>Second<br/>pandemic</b>                                         | <i>Case 12</i> |                                             | X                                                                       | X                                                                                        | X Rare              |                               |                        | X                                               |                            |                         |
|                                                                    | <i>Case 13</i> |                                             | X                                                                       | X                                                                                        |                     |                               |                        |                                                 |                            |                         |
|                                                                    | <i>Case 14</i> |                                             | X                                                                       | X                                                                                        |                     |                               |                        |                                                 |                            |                         |

|                                                                     |                                    |   |                                         |        |                                          |                                 |
|---------------------------------------------------------------------|------------------------------------|---|-----------------------------------------|--------|------------------------------------------|---------------------------------|
| <b>wave</b><br><br><b>(11/2020-12/2020)</b>                         | <b>Case 15</b>                     | X | X                                       |        |                                          | Skull and dural<br>plasmocytoma |
|                                                                     | <b>Case 16</b>                     | X | X                                       | X Rare |                                          |                                 |
|                                                                     | <b>Case 17</b>                     | X | X                                       | X Rare |                                          | X                               |
|                                                                     | <b>Case 18</b>                     | X | X                                       | X      | Parietal, brain stem,<br>pituitary gland | X                               |
|                                                                     | <b>Case 19</b>                     | X | X                                       | X Rare | Rolandic                                 | X                               |
|                                                                     | <b>Case 20</b> X (olfactory tract) | X | X                                       | X Rare |                                          | X                               |
| <b>Third<br/>pandemic<br/>waves</b><br><br><b>(01/2021-04/2021)</b> | <b>Case 21</b>                     | X | X                                       | X      | Frontal, rolandic                        | X                               |
|                                                                     | <b>Case 22</b>                     | X | X                                       |        |                                          |                                 |
|                                                                     | <b>Case 23</b>                     | X | X acute small and large<br>haemorrhages | X      | Frontal                                  | X X (infratentorial)            |
|                                                                     | <b>Case 24</b>                     | X | X                                       |        |                                          | X                               |
|                                                                     | <b>Case 25</b>                     | X | X                                       |        |                                          | X                               |
|                                                                     | <b>Case 26</b>                     | X | X                                       |        |                                          | X                               |
|                                                                     | <b>Case 27</b>                     | X | X                                       |        |                                          | X                               |
|                                                                     | <b>Case 28</b>                     | X | X                                       | X      |                                          | X                               |
|                                                                     | <b>Case 29</b>                     | X | X                                       |        |                                          | X                               |
|                                                                     | <b>Case 30</b>                     | X | X                                       |        |                                          | X                               |
|                                                                     | <b>Case 31</b>                     | X | X                                       |        |                                          |                                 |
|                                                                     | <b>Case 32</b>                     | X | X                                       |        |                                          |                                 |
|                                                                     | <b>Case 33</b>                     | X | X                                       |        |                                          |                                 |
