# Supplementary material for: COVID-19 and the Brain: The Neuropathological Italian Experience on 33 Adult Autopsies
Source: MDPI journal article supplement (doi:10.3390/biom12050629), 2022-04-25
Supplement: s1 [file s1]

Table S1: clinical data (M: male; F: female; ECMO: Extra-Corporeal Membrane Oxygenation; BAL: Broncho-Alveolar Lavage; PNX: pneumothorax; OB: obstructive bronchitis; MRSA: Methicillin-resistant Staphylococcus aureus; UIP: usual interstitial pneumonia; DVP: deep vein thrombosis; DAOD: distal arterial occlusive disease, RBBB: Right bundle branch block).

|                                          |         | Age | Gender | Symptoms duration before death (days) | PM interval (hours) | Associated pathologies                                                                                                  | First symptoms                                                                               | Other                                                                                       |
|------------------------------------------|---------|-----|--------|---------------------------------------|---------------------|-------------------------------------------------------------------------------------------------------------------------|----------------------------------------------------------------------------------------------|---------------------------------------------------------------------------------------------|
| First pandemic wave<br>(02/2020-04/2020) | Case 1  | 51  | M      | 6                                     | 31                  | - Ictus cerebri (2006)<br>- Hypertension<br>- Glaucoma<br>- Kidney failure<br>- Drug abuser                             | - Dyspnea<br>- Fever                                                                         | - Dialysis<br>- <i>C. glabrata</i>                                                          |
|                                          | Case 2  | 64  | M      | 16                                    | 72                  | - Obesity<br>- Hypertension                                                                                             | - Dyspnea<br>- Fever                                                                         | - Dialysis                                                                                  |
|                                          | Case 3  | 70  | F      | 13                                    | 38                  | - Ictus cerebri (2015)<br>- Obesity<br>- Smoker                                                                         | - Dyspnea<br>- Fever                                                                         |                                                                                             |
|                                          | Case 4  | 62  | M      | 14                                    | 36                  | - Obesity<br>- Hypertension                                                                                             | - Dyspnea<br>- Fever                                                                         |                                                                                             |
|                                          | Case 5  | 44  | M      | 26                                    | 29                  | - Diabetes type I<br>- Obesity<br>- Hypertension                                                                        | - Dyspnea                                                                                    | - ECMO<br>- <i>E. coli</i>                                                                  |
|                                          | Case 6  | 64  | F      | 25                                    | 50                  | - Obesity<br>- Crohndisease                                                                                             | - Dyspnea                                                                                    | - <i>C. glabrata</i>                                                                        |
|                                          | Case 7  | 52  | M      | 16                                    | 55                  | - Obesity<br>- Hypertension                                                                                             | - Dyspnea                                                                                    |                                                                                             |
|                                          | Case 8  | 66  | M      | 35                                    | 25                  | - Hypertension<br>- Dyslipidemia                                                                                        | - Fever                                                                                      | - <i>P. aeruginosa</i><br>- <i>S. aureus</i><br>- <i>C. albicans</i><br>- <i>S. capitis</i> |
|                                          | Case 9  | 74  | M      | 26                                    | 24                  | - Ischemic cardiomyopathy (previous acute myocardial infarction)<br>- OB<br>- Atrial fibrillation<br>- Diabetes type II | - Urinary retention (pelvic mass)<br>- Fever<br>- Syncope<br>- Previous pneumonia (February) | - During hospitalization, pneumonia SARS-CoV2 related<br>- MRSA<br>- PNX                    |
|                                          | Case 10 | 62  | F      | 17                                    | 37                  | - Hypothyroidism                                                                                                        | - Fever<br>- Muscular weakness                                                               | - <i>S. aureus</i>                                                                          |

|                                                                          |         |    |   |    |    |                                                                               |                                                               |                                                                        |
|--------------------------------------------------------------------------|---------|----|---|----|----|-------------------------------------------------------------------------------|---------------------------------------------------------------|------------------------------------------------------------------------|
|                                                                          | Case 11 | 58 | M | 51 | 24 | - Hypertension                                                                | - Fever<br>- Dyspnea                                          | - <i>E. faecium</i><br>- <i>S. capitis</i><br>- <i>P. aeruginosa</i>   |
| <b>Second<br/>pandemic<br/>wave</b><br><br><b>(09/2020-<br/>12/2020)</b> | Case 12 | 63 | F | 30 | 24 | - Hypertension<br>- Dyslipidemia                                              |                                                               |                                                                        |
|                                                                          | Case 13 | 79 | F | 9  | 24 | - Obesity<br>- Hypertension                                                   | - Sepsis                                                      | - DVP                                                                  |
|                                                                          | Case 14 | 66 | M | 38 | 24 | - Obesity<br>- OB<br>- Hypertension                                           | - Fever<br>- Dyspnea                                          | - ECMO<br>- multiple bleedings                                         |
|                                                                          | Case 15 | 52 | F | 6  | 24 | - Kidney failure<br>- Multiple Myeloma<br>- Rheumatoid arthritis              | - Dyspnea<br>- low back pain                                  |                                                                        |
|                                                                          | Case 16 | 74 | M | 31 | 24 | - Hypertension<br>- Dyslipidemia<br>- UIP                                     | - Fever<br>- Dyspnea                                          | - <i>Aspergillus</i>                                                   |
|                                                                          | Case 17 | 75 | M | 36 | 24 | - Hypertension                                                                | - Fever<br>- Dyspnea                                          | - <i>S. epidermidis</i><br>- <i>S. pneumoniae</i>                      |
|                                                                          | Case 18 | 58 | M | 10 | 24 | - Hypertension<br>- Dyslipidemia<br>- Obesity<br>- Diabetes type II           | - Fever<br>- Dyspnea                                          |                                                                        |
|                                                                          | Case 19 | 77 | M | 45 | 24 | - Colonic adenocarcinoma<br>- Dyslipidemia<br>- Obesity<br>- Diabetes type II | - Urinary Sepsis<br>- Dyspnea                                 | - <i>Acute cholecystitis</i><br>- <i>E. faecium</i>                    |
|                                                                          | Case 20 | 47 | M | 25 | 24 | - Obesity                                                                     | - Fever<br>- Syncope                                          | - <i>K.pneumoniae</i><br>- <i>Aspergillus</i>                          |
| <b>Third<br/>pandemic<br/>wave</b><br><br><b>(01/2021-<br/>04/2021)</b>  | Case 21 | 86 | M | 11 | 24 | - DAOD<br>- Kidney failure<br>- Coronaropathy<br>- Dyslipidemia<br>- DM       | - Fever and SARS-CoV-2 positivity after surgery (DAOD)        | - <i>S. lugdunensis</i>                                                |
|                                                                          | Case 22 | 55 | F | 12 | 72 |                                                                               | - Syncope                                                     | - DVP and pulmonary embolism                                           |
|                                                                          | Case 23 | 60 | M | 43 | 72 | - Hypertension                                                                | - Fever and SARS-CoV-2 positivity after surgery (gallbladder) | - <i>Acinetobacter</i><br>- <i>K. pneumonia</i><br>- Cerebral bleeding |
|                                                                          | Case 24 | 59 | M | 10 | 24 | - Obesity<br>- Hypertension                                                   | - Dyspnea                                                     |                                                                        |
|                                                                          | Case 25 | 72 | M | 14 | 72 | - Renal Cell Carcinoma<br>- Colon Cancer                                      | - Fever<br>- Dyspnea                                          | - Retroperitoneal haematoma                                            |
|                                                                          | Case 26 | 75 | F | 24 | 48 | - Obesity<br>- Hypertension                                                   | - Fever<br>- Weakness                                         | - <i>E. faecalis</i>                                                   |

|         |    |   |    |    |                                                                                                       |                         |                         |
|---------|----|---|----|----|-------------------------------------------------------------------------------------------------------|-------------------------|-------------------------|
|         |    |   |    |    | - Dyslipidemia                                                                                        |                         |                         |
| Case 27 | 59 | M | 28 | 24 | - Coronaropathy<br>- Hypetension<br>- RBBB                                                            | - Dyspnea<br>- Weakness | - <i>P. aeruginosa</i>  |
| Case 28 | 78 | M | 27 | 48 | - OB                                                                                                  | - Fever<br>- Dyspnea    | - <i>S.epidermidis</i>  |
| Case 29 | 58 | M | 27 | 24 | - Smoker                                                                                              | - Dyspnea<br>- Headache | - <i>DVP</i>            |
| Case 30 | 66 | M | 18 | 24 | - Obesity<br>- Hypertension<br>- DM                                                                   | - Fever<br>- Dyspnea    |                         |
| Case 31 | 63 | M | 10 | 24 | - Obesity<br>- Hypertension<br>- Ischemic cardiomyopathy<br>(previous acute myocardial<br>infarction) | - Fever<br>- Dyspnea    | - <i>Kidney failure</i> |
| Case 32 | 65 | M | 19 | 24 | - DM<br>- Dyslipidemia<br>- Kidney failure                                                            | - Fever<br>- Dyspnea    |                         |
| Case 33 | 90 | M | 5  | 24 | - DM<br>- Kidney failure                                                                              | - Fever<br>- Dyspnea    |                         |
