# Supplementary material for: COVID-19 and the Brain: The Neuropathological Italian Experience on 33 Adult Autopsies
Source: MDPI journal article supplement (doi:10.3390/biom12050629), 2022-04-25
Supplement: s1 [file s1]

Table S2: Summary of gross neuropathological findings (*IC: internal carotid*).

|                                                          |                | Brain features      |               |                               |                   | Meningeal features        |                            |                         | Large vessels          |
|----------------------------------------------------------|----------------|---------------------|---------------|-------------------------------|-------------------|---------------------------|----------------------------|-------------------------|------------------------|
|                                                          |                | <i>Weight (gr.)</i> | <i>Oedema</i> | <i>Infarction/Haemorrhage</i> | <i>Herniation</i> | <i>Vessels congestion</i> | <i>Blood extravasation</i> | <i>Purulent exudate</i> |                        |
| <b>First pandemic wave</b><br><i>(02/2020-04/2020)</i>   | <i>Case 1</i>  | 1480                | Yes           | Left frontal infarction       |                   | Yes                       |                            |                         | <i>Atherosclerosis</i> |
|                                                          | <i>Case 2</i>  | 1670                | Yes           | Right parietal infarction     |                   | Yes                       |                            |                         |                        |
|                                                          | <i>Case 3</i>  | 1320                | Yes           | Right frontal infarction      |                   | Yes                       |                            |                         |                        |
|                                                          | <i>Case 4</i>  | 1870                | Yes           |                               |                   | Yes                       |                            |                         |                        |
|                                                          | <i>Case 5</i>  | 1870                | Yes           |                               | Uncal             | Yes                       |                            |                         |                        |
|                                                          | <i>Case 6</i>  | 1350                | Yes           |                               | Uncal             | Yes                       |                            |                         | <i>Atherosclerosis</i> |
|                                                          | <i>Case 7</i>  | 1650                | Yes           |                               |                   | Yes                       |                            |                         |                        |
|                                                          | <i>Case 8</i>  | 1300                | Yes           |                               |                   | Yes                       |                            | Yes                     |                        |
|                                                          | <i>Case 9</i>  | 1490                | Yes           |                               |                   | Yes                       | Yes (supratentorial)       | Yes                     |                        |
|                                                          | <i>Case 10</i> | 1350                | Yes           |                               |                   | Yes                       |                            |                         |                        |
|                                                          | <i>Case 11</i> | 1380                | Yes           |                               |                   | Yes                       |                            | Yes                     |                        |
| <b>Second pandemic waves</b><br><i>(11/2020-12/2020)</i> | <i>Case 12</i> | 1360                | Yes           |                               |                   | Yes                       |                            |                         |                        |
|                                                          | <i>Case 13</i> | 1390                | Yes           |                               | Uncal             | Yes                       |                            |                         |                        |
|                                                          | <i>Case 14</i> | 1380                | Yes           |                               |                   | Yes                       |                            |                         |                        |
|                                                          | <i>Case 15</i> | 1350                | Yes           |                               |                   | Yes                       |                            |                         |                        |
|                                                          | <i>Case 16</i> | 1400                | Yes           |                               |                   | Yes                       |                            |                         |                        |
|                                                          | <i>Case 17</i> | 1360                | Yes           |                               |                   | Yes                       |                            |                         |                        |

|                                                                     |                |      |     |                                                             |     |                 |                          |
|---------------------------------------------------------------------|----------------|------|-----|-------------------------------------------------------------|-----|-----------------|--------------------------|
| <b>Third<br/>pandemic<br/>waves<br/><br/>(01/2021-<br/>04/2021)</b> | <i>Case 18</i> | 1360 | Yes |                                                             | Yes |                 | <i>Right IC aneurysm</i> |
|                                                                     | <i>Case 19</i> | 1360 | Yes | Right pre-rolandic infarction                               | Yes |                 | <i>Atherosclerosis</i>   |
|                                                                     | <i>Case 20</i> | 1390 | Yes |                                                             | Yes |                 |                          |
|                                                                     | <i>Case 21</i> | 1680 | Yes | Right frontal, pre-rolandic infarction                      | Yes |                 | <i>Atherosclerosis</i>   |
|                                                                     | <i>Case 22</i> | 1290 | Yes |                                                             | Yes |                 |                          |
|                                                                     | <i>Case 23</i> | 1580 | Yes | Multiple acute haemorrhages (brain, brain stem, cerebellum) | Yes | Yes (tentorium) | <i>Atherosclerosis</i>   |
|                                                                     | <i>Case 24</i> | 1420 | Yes |                                                             | Yes |                 |                          |
|                                                                     | <i>Case 25</i> | 1230 | Yes |                                                             | Yes |                 |                          |
|                                                                     | <i>Case 26</i> | 1150 | Yes |                                                             | Yes |                 |                          |
|                                                                     | <i>Case 27</i> | 1450 | Yes |                                                             | Yes |                 |                          |
|                                                                     | <i>Case 28</i> | 1360 | No  |                                                             | No  |                 |                          |
|                                                                     | <i>Case 29</i> | 1600 | Yes | Uncal                                                       | Yes |                 | <i>Atherosclerosis</i>   |
|                                                                     | <i>Case 30</i> | 1400 | Yes |                                                             | Yes |                 | <i>Atherosclerosis</i>   |
|                                                                     | <i>Case 31</i> | 1290 | Yes |                                                             |     |                 |                          |
|                                                                     | <i>Case 32</i> | 1400 | Yes |                                                             |     |                 |                          |
|                                                                     | <i>Case 33</i> | 1410 | Yes |                                                             |     |                 |                          |
